# Supplementary material
Source: PubMed Central journal article supplement (PMC9345674)
Supplement: 10-1055-s-0041-1725123-s2000159.pdf [file 10-1055-s-0041-1725123-s2000159.pdf]

# Lung Ultrasound versus Chest X Ray for the Detection of Fluid Overload in Critically Ill Children: a Systematic Review

Emily Schapka, Jerica Gee, John Cyrus, Gregory Goldstein, Kara Greenfield, Mark Marinello, Oliver Karam

## Search Strategy – Online Supplemental Data

### Ovid Medline Search Strategy

|    |                                                                                                                                                           |
|----|-----------------------------------------------------------------------------------------------------------------------------------------------------------|
| 1  | exp Radiography, Thoracic/                                                                                                                                |
| 2  | ((chest or lung* or thora* or pulm*) adj4 (xray* or x-ray* or radiograph* or radiogram* or radiolog* or roentgen*)).mp.                                   |
| 3  | 1 or 2                                                                                                                                                    |
| 4  | exp Ultrasonography/                                                                                                                                      |
| 5  | ((chest or lung* or thora* or pulm*) adj4 (sonogra* or ultrasound* or ultrasonic* or ultrasonogra* or ultrasound* or ultra-sonic* or ultra-sonogra*)).mp. |
| 6  | 4 or 5                                                                                                                                                    |
| 7  | exp Extravascular Lung Water/ or exp Water-Electrolyte Imbalance/ or exp Fluid Therapy/ or exp Water-Electrolyte Balance/ or exp Pulmonary Edema/         |
| 8  | ((pulm* or lung*) adj3 (edema* or oedema*)).mp.                                                                                                           |
| 9  | ((extravascular or extra-vascular) adj3 (water or fluid)).mp.                                                                                             |
| 10 | (fluid overload or excess total body water or hypervolemia or wet lung).mp.                                                                               |
| 11 | 7 or 8 or 9 or 10                                                                                                                                         |
| 12 | 3 and 6 and 11                                                                                                                                            |

### Ovid Embase Search Strategy

|   |                                                                                                                                                                                                                                                                                                                                                                                                   |
|---|---------------------------------------------------------------------------------------------------------------------------------------------------------------------------------------------------------------------------------------------------------------------------------------------------------------------------------------------------------------------------------------------------|
| 1 | exp thorax radiography/ or ((chest or lung* or thoracic or thorax or pulmonary) adj3 (xray* or x-ray* or radiograph* or radiogram* or radiolog* or roentgen*)).mp.                                                                                                                                                                                                                                |
| 2 | echography/ or contrast-enhanced ultrasound/ or doppler ultrasonography/ or endoscopic ultrasonography/ or interventional ultrasonography/ or intravascular ultrasound/ or real time echography/ or exp ultrasound/ or ((chest or lung* or thoracic or thorax or pulmonary) adj3 (sonogra* or ultrasound* or ultrasonic* or ultrasonogra* or ultra-sound* or ultra-sonic* or ultra-sonogra*)).mp. |
| 3 | exp hypervolemia/ or exp fluid therapy/ or exp lung edema/ or exp lung extravascular fluid/                                                                                                                                                                                                                                                                                                       |
| 4 | (fluid overload or excess total body water or hypervolemia or wet lung).mp.                                                                                                                                                                                                                                                                                                                       |
| 5 | ((extravascular or extra-vascular) adj3 (water or fluid)).mp.                                                                                                                                                                                                                                                                                                                                     |
| 6 | ((pulm* or lung*) adj3 (edema* or oedema*)).mp.                                                                                                                                                                                                                                                                                                                                                   |
| 7 | 3 or 4 or 5 or 6                                                                                                                                                                                                                                                                                                                                                                                  |
| 8 | 1 and 2 and 7                                                                                                                                                                                                                                                                                                                                                                                     |

## Cochrane Search Strategy

|     |                                                                                                                                                        |
|-----|--------------------------------------------------------------------------------------------------------------------------------------------------------|
| #1  | MeSH descriptor: [Radiography, Thoracic] explode all trees                                                                                             |
| #2  | (chest or lung* or thora* or pulm*) NEAR/4 (xray* or x-ray* or radiograph* or radiogram* or radiolog* or roentgen*)                                    |
| #3  | #1 OR #2                                                                                                                                               |
| #4  | MeSH descriptor: [Ultrasonography] explode all trees                                                                                                   |
| #5  | (chest or lung* or thora* or pulm*) NEAR/4 (sonogra* or ultrasound* or ultrasonic* or ultrasonogra* or ultra-sound* or ultra-sonic* or ultra-sonogra*) |
| #6  | #4 OR #5                                                                                                                                               |
| #7  | MeSH descriptor: [Extravascular Lung Water] explode all trees                                                                                          |
| #8  | MeSH descriptor: [Water-Electrolyte Balance] explode all trees                                                                                         |
| #9  | MeSH descriptor: [Water-Electrolyte Imbalance] explode all trees                                                                                       |
| #10 | MeSH descriptor: [Fluid Therapy] explode all trees                                                                                                     |
| #11 | MeSH descriptor: [Pulmonary Edema] explode all trees                                                                                                   |
| #12 | #7 OR #8 OR #9 OR #10 OR #11                                                                                                                           |
| #13 | (pulm* or lung*) NEAR/3 (edema* or oedema*)                                                                                                            |
| #14 | (extravascular or extra-vascular) NEAR/3 (water or fluid)                                                                                              |
| #15 | fluid overload OR excess total body water OR hypervolemia OR wet lung                                                                                  |
| #16 | #12 OR #13 OR #14 OR #15                                                                                                                               |
| #17 | #3 AND #6 AND #16                                                                                                                                      |

## Clinical Trials.gov

|                           |                                                                                                                                                                                                                                      |
|---------------------------|--------------------------------------------------------------------------------------------------------------------------------------------------------------------------------------------------------------------------------------|
| <b><u>Condition</u></b>   | "pulmonary edema" OR "pulmonary oedema" OR "extravascular water" OR "extravascular fluid" OR "extra-vascular water" OR "extra-vascular fluid" OR "fluid overload" OR "excess total body water" OR hypervolemia OR "wet lung"         |
| <b><u>Other terms</u></b> | (xray OR x-ray OR radiograph OR radiogram OR radiology OR roentgen) AND (sonogram OR sonography OR ultrasound OR ultrasonic OR ultrasonogram OR ultrasonography OR ultra-sound OR ultra-sonic OR ultra-sonogram OR ultra-sonography) |

## Dissertations and Theses

|    |                                                                                                                                                                                                                                                                                                                                                                                                                                                                                    |
|----|------------------------------------------------------------------------------------------------------------------------------------------------------------------------------------------------------------------------------------------------------------------------------------------------------------------------------------------------------------------------------------------------------------------------------------------------------------------------------------|
| S5 | ((chest or lung* or thora* or pulm*) N/4 (xray* or x-ray* or radiograph* or radiogram* or radiolog* or roentgen*)) AND ((chest or lung* or thora* or pulm*) N/4 (sonogra* or ultrasound* or ultrasonic* or ultrasonogra* or ultra-sound* or ultra-sonic* or ultra-sonogra*)) AND (((pulm* or lung*) N/3 (edema* or oedema*)) OR ((extravascular or extra-vascular) N/3 (water or fluid)) OR (fluid overload OR excess total body water OR hypervolemia OR wet lung))Limits applied |
| S4 | ((chest or lung* or thora* or pulm*) N/4 (xray* or x-ray* or radiograph* or radiogram* or radiolog* or roentgen*)) AND ((chest or lung* or thora* or pulm*) N/4 (sonogra* or ultrasound* or ultrasonic* or ultrasonogra* or ultra-sound* or ultra-sonic* or ultra-sonogra*)) AND (((pulm* or lung*) N/3 (edema* or oedema*)) OR ((extravascular or extra-vascular) N/3 (water or fluid)) OR (fluid overload OR excess total body water OR hypervolemia OR wet lung))               |
| S3 | ((pulm* or lung*) N/3 (edema* or oedema*)) OR ((extravascular or extra-vascular) N/3 (water or fluid)) OR (fluid overload OR excess total body water OR hypervolemia OR wet lung)                                                                                                                                                                                                                                                                                                  |
| S2 | (chest or lung* or thora* or pulm*) N/4 (sonogra* or ultrasound* or ultrasonic* or ultrasonogra* or ultra-sound* or ultra-sonic* or ultra-sonogra*)                                                                                                                                                                                                                                                                                                                                |
| S1 | (chest or lung* or thora* or pulm*) N/4 (xray* or x-ray* or radiograph* or radiogram* or radiolog* or roentgen*)                                                                                                                                                                                                                                                                                                                                                                   |
